# Supplementary material for: Molecular landscape of TP53 mutations in breast cancer and their utility for predicting the response to HER‐targeted therapy in HER2 amplification‐positive and HER2 mutation‐positive amplification‐negative patients
Source: PubMed Central journal article supplement (PMC9302303; doi:10.1002/cam4.4652), 2022-04-07
Supplement: CAM4-11-2767-s002.pdf [file CAM4-11-2767-s002.pdf]

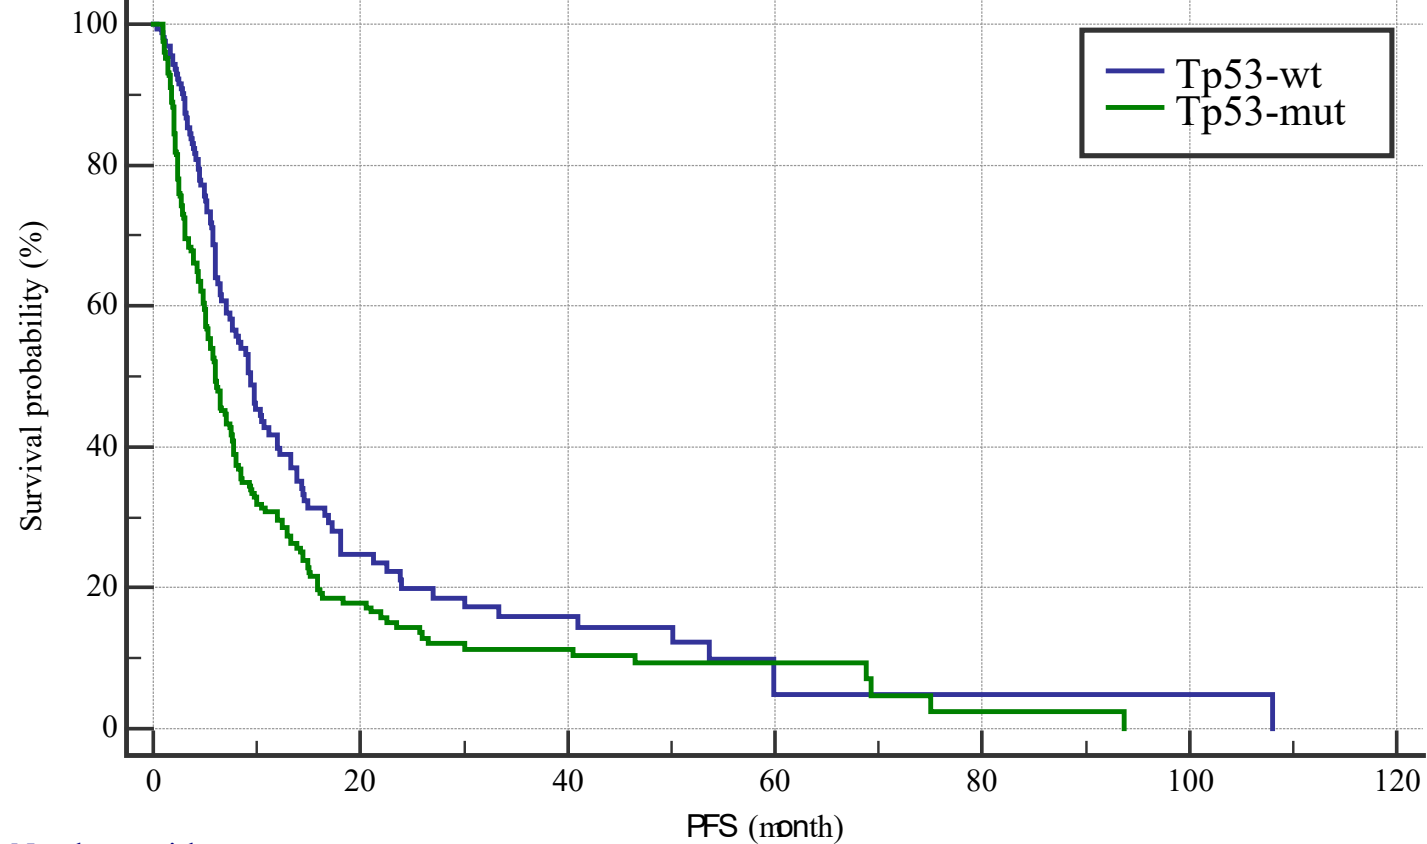

Number at risk

Group: Tp53-wt

|     |    |    |   |   |   |   |
|-----|----|----|---|---|---|---|
| 167 | 21 | 10 | 1 | 1 | 1 | 0 |
|-----|----|----|---|---|---|---|

Group: Tp53-mut

|     |    |    |   |   |   |   |
|-----|----|----|---|---|---|---|
| 257 | 26 | 12 | 4 | 1 | 0 | 0 |
|-----|----|----|---|---|---|---|
