# Supplementary material for: Molecular landscape of TP53 mutations in breast cancer and their utility for predicting the response to HER‐targeted therapy in HER2 amplification‐positive and HER2 mutation‐positive amplification‐negative patients
Source: PubMed Central journal article supplement (PMC9302303; doi:10.1002/cam4.4652), 2022-04-07
Supplement: CAM4-11-2767-s003.pdf [file CAM4-11-2767-s003.pdf]

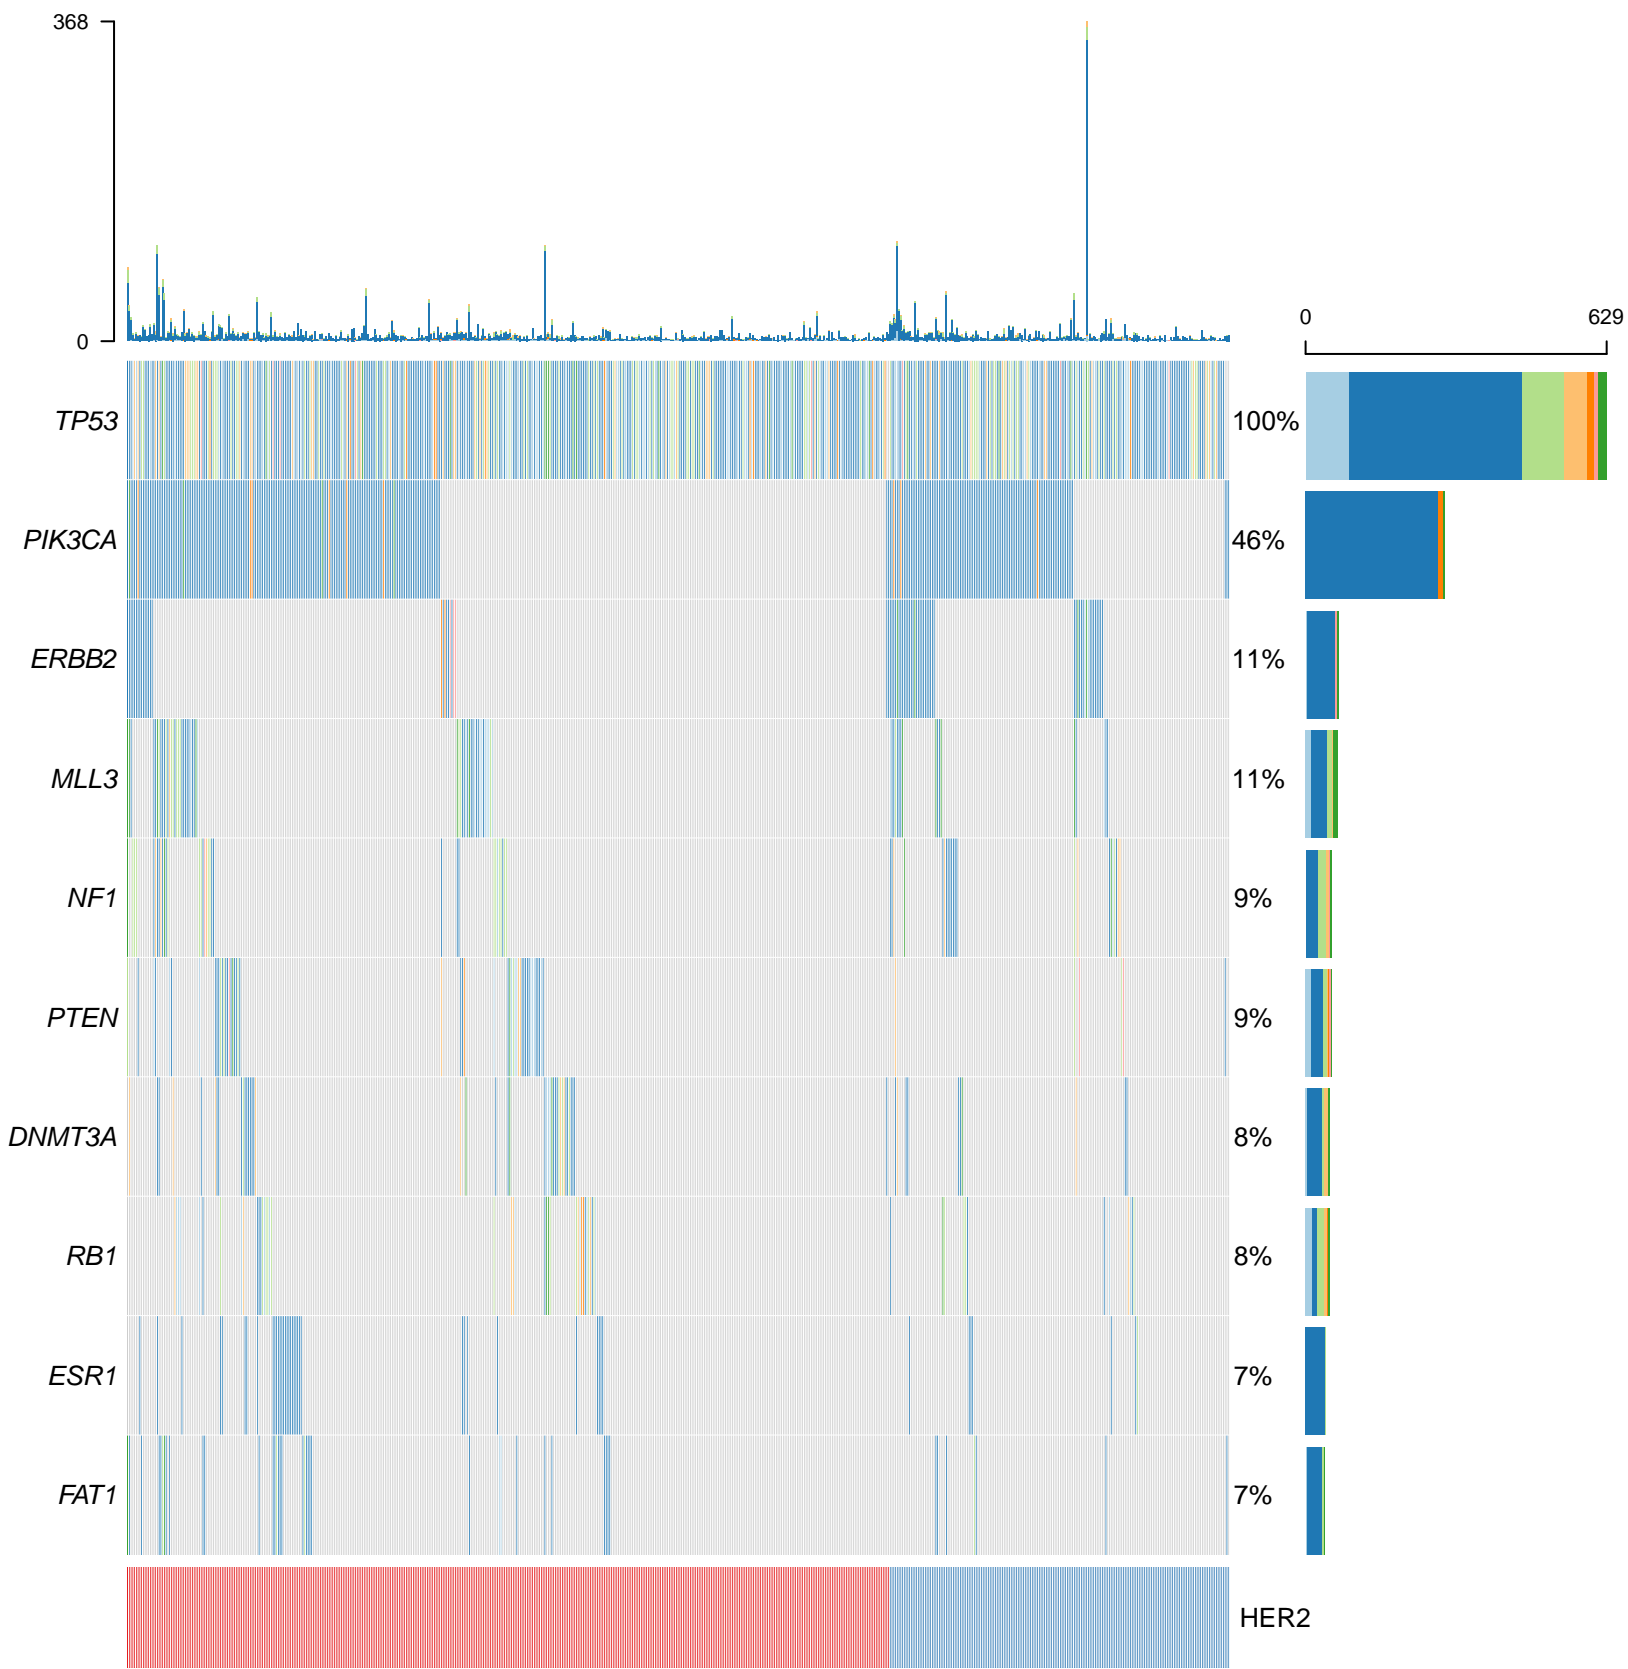

- Frame\_Shift\_Del
- Missense\_Mutation
- Nonsense\_Mutation
- Splice\_Site
- In\_Frame\_Del
- Frame\_Shift\_Ins
- Multi\_Hit
- HER2
- 0
- 1
