# Supplementary material for: Molecular landscape of TP53 mutations in breast cancer and their utility for predicting the response to HER‐targeted therapy in HER2 amplification‐positive and HER2 mutation‐positive amplification‐negative patients
Source: PubMed Central journal article supplement (PMC9302303; doi:10.1002/cam4.4652), 2022-04-07
Supplement: CAM4-11-2767-s004.pdf [file CAM4-11-2767-s004.pdf]

**A**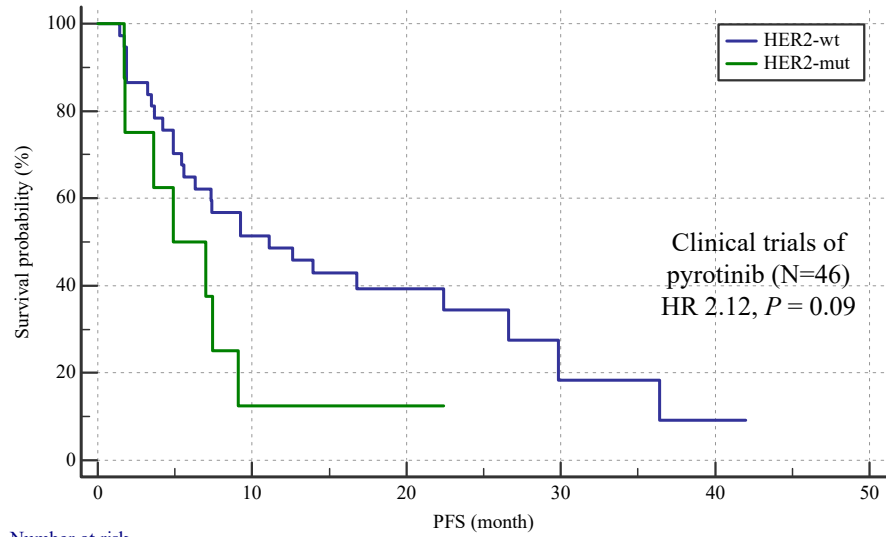

Number at risk  
Group: HER2-wt  
37  
Group: HER2-mut  
8

**B**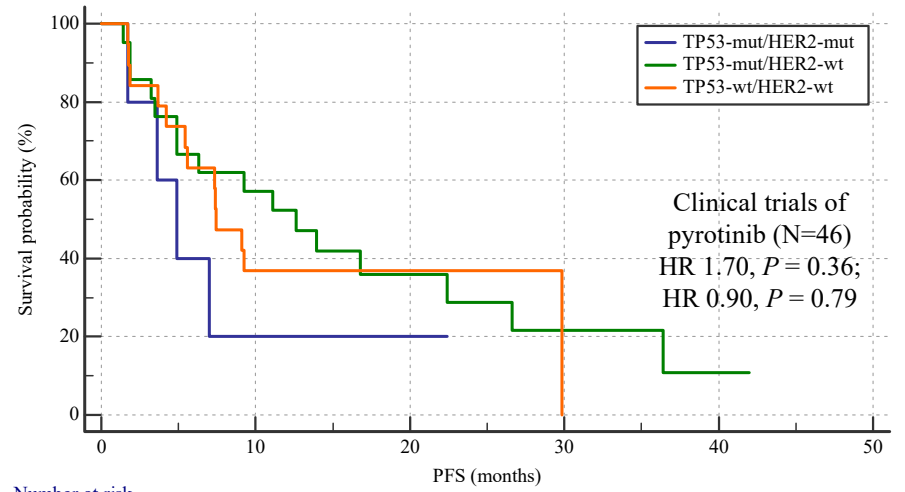

Number at risk  
Group: TP53-mut/HER2-mut  
5  
Group: TP53-mut/HER2-wt  
21  
Group: TP53-wt/HER2-wt  
19
